# Supplementary material
Source: Research Square preprint supplement (doi:10.21203/rs.3.rs-9849292/v2)
Supplement: Supplementary file 1 [file 3b0b6025e26c03e21e004365.xlsx]

## Sheet: ReadMe
S1_Data.xlsx - Supplementary Data File (English Version)
Manuscript: "Beyond the Traditional Learning Curve: Evidence of Technical
Expansion Pattern in Single-Port Laparoscopic Surgery"
CONTENTS:
Sheet 1: ReadMe - Data description and column mapping
Sheet 2: GSDS_Schema - Complete GSDS scoring rules (54 items)
Sheet 3: Patient_Data - 130 anonymized cases (130 rows x 38 columns)
---
COLUMN DEFINITIONS
---
Case_ID : Sequential case number (1-130)
Age : Age in years (Y-prefix format, e.g., Y29 = 29 years)
Length_of_Stay : Total hospital stay in days
BMI : Body mass index (kg/m²)
Prior_Surgery_Count : Number of prior abdominal surgeries
Prior_Open_Surgery : Number of prior open abdominal surgeries
Preoperative_Diagnosis : Preoperative diagnosis (simplified)
Procedure : Surgical procedure (English translation)
Endometriosis_Adhesiolysis_1pt : Endometriosis with adhesiolysis (+1 point)
Hysteroscopy_Complexity : Concurrent hysteroscopy complexity (None/Simple/Complex)
Incision_Type : Incision approach (Single-port/Multiport/Single-port-plus-one)
Procedure_Category : Procedure category by operative approach
Emergency_Status : Emergency (torsion/rupture/ectopic) vs. Elective
Intraop_Blood_Loss_mL : Estimated intraoperative blood loss (mL)
Transfusion_mL : Allogeneic blood transfusion volume (mL)
Preop_Hb_gL : Preoperative hemoglobin (g/L)
Postop_Hb_gL : Postoperative hemoglobin (g/L)
Operative_Time_min : Operative time in minutes
Hb_Drop_gL : Pre-to-postoperative hemoglobin difference (g/L)
Uterine_Weight_g : Uterine weight in grams (measured/weighed)
Weight_Measurement_Method : Method for uterine weight measurement
Hemoperitoneum_mL : Hemoperitoneum volume in mL
Cyst_Max_Diameter_mm : Maximum cyst diameter in mm
Cysts_Excised : Number of cysts excised
Myoma_Max_Diameter_mm : Maximum myoma diameter in mm
Myomas_Excised : Number of myomas excised
Adverse_Event : Adverse event description (if any)
Core_Difficulty_Score : GSDS core difficulty score
Time_Interference_Score : GSDS time-interference score
Total_Score : GSDS total score (core + time-interference)
Difficulty_Grade : GSDS difficulty grade (Low/Moderate/High/Extreme)
Procedure_Baseline : Procedure baseline score (0-5)
FIGO_Increment : FIGO myoma type increment
Size_Increment : Size increment (lesion/uterine)
Patient_Factor : Patient factor increment (BMI + surgery history)
Endometriosis_Score : Endometriosis with adhesiolysis score
GRADE CLASSIFICATION:
Low (0-2): Core score 0-2, expected OT <90 min
Moderate (3-5): Core score 3-5, expected OT 90-150 min
High (6-8): Core score 6-8, expected OT 150-240 min
Extreme (>=9): Core score >=9, expected OT >240 min
NOTE ON ANONYMIZATION:
Narrative clinical notes have been excluded to protect patient privacy.
All quantitative data required for analysis are fully preserved.
Procedure names have been translated to standardized English terms.
Date Generated: 2026-05-29
Version: 2.0 (English)

## Sheet: GSDS_Schema
Module	Item	Score	Description	Notes
SPL-GYN Preoperative Surgical Difficulty Scoring System
A. Procedure Baseline Score				Maximum 5 points
	Diagnostic laparoscopy	0	Minimum baseline
	Salpingectomy	1
	Adnexectomy	2
	Tuboplasty/anastomosis/repair	2	Includes ostomy/anastomosis/repair
	Tubal pregnancy removal	2	Includes salpingostomy/exprimation
	Ovarian cystectomy	3
	Myomectomy	3	Plus FIGO type increment	Baseline 3 pts
	FIGO Type 7 (pedunculated subserosal)	+0	Shortest path, ligate then transect
	FIGO Type 6/5/4 (intramural)	+0.5	Standard intramural procedure
	FIGO Type 3/2 (subserosal/mucosal)	+1	Endometrial preservation required
	FIGO Type 1/0 (submucosal)	—	Not via laparoscopy; via hysteroscopy
	Special location (cervical/broad ligament/lower posterior)	+2	Space-limited, high anatomical variation
	Broad ligament myomectomy	3+2	Baseline 3 + special location 2
	Rudimentary horn resection	5
	Total hysterectomy	5	Maximum baseline
	Severe endometriosis	+1	Severe adhesions
B. Size Increment
	Cyst diameter	≥6cm +1
		≥10cm +2	All ovarian cystectomies
	Myoma diameter	≥6cm +1	Includes Type 7 and special locations
		≥8cm +2
	Uterine weight	300-500g +1
		500-800g +2
		≥800g +3	Ceiling effect reached	Same geometric principles >800g
C. Patient Factors
	BMI	≥28 +1	Overweight
		≥35 +2	Severe obesity
	Prior abdominal surgery	1-time +1	Includes laparoscopic or open
		≥2-times +2	Cumulative effect
	Prior open abdominal surgery	Each open surgery +1	Additional weight for open-surgery adhesion risk
D. Time-Interference Score (Not included in core difficulty)				Maximum 3 points; for time estimation only
	Cysts excised ≥3	+0.5	Time accumulation only
	Myomas excised ≥3	+0.5	Additional hemostasis management needed
	Concurrent hysteroscopy (simple)	+0.5	Concurrent procedure time overlap
	Concurrent hysteroscopy (complex)	+1.0
	Emergency hemoperitoneum ≥500mL	+0.5	Clot evacuation time-consuming
Difficulty Grading Criteria
	Low	0-2 points	<90 min	39 cases (30.0%)
	Moderate	3-5 points	90-150 min	60 cases (46.2%)
	High	6-8 points	150-240 min	22 cases (16.9%)
	Extreme	≥9 points	>240 min	9 cases (6.9%)
Calculation Examples
	#93 Myoma 136mm (Type 7)	3+0+2=5 pts	Baseline 3 + FIGO7 0 + Size 2	Moderate
	#72 Total hysterectomy 525g (BMI 30.7, 3 prior surgeries, endometriosis)	5+2+1+2+2+1=13 pts	Baseline 5 + Size 2 + BMI 1 + Surgery 2 + Open 2 + Endometriosis 1	Extreme
	#27 Broad ligament myoma 64mm (2 prior surgeries)	3+2+1+2+2=10 pts	Baseline 3 + Special 2 + Size 1 + Surgery 2 + Open 2	Extreme
	#82 Ovarian cyst 100mm (endometriosis)	3+2+1=6 pts	Baseline 3 + Size 2 + Endometriosis 1	High

## Sheet: Patient_Data（n=130）
Case_ID	Age	Length_of_Stay	BMI	Prior_Surgery_Count	Prior_Open_Surgery	Preoperative_Diagnosis	Endometriosis_Adhesiolysis_1pt	Hysteroscopy_Complexity	Incision_Type	Procedure_Type	Emergency_Status	Intraop_Blood_Loss_mL	Transfusion_mL	Preop_Hb_gL	Postop_Hb_gL	Operative_Time_min	Hb_Drop_gL	Uterine_Weight_g	Weight_Measurement_Method	Hemoperitoneum_mL	Cyst_Max_Diameter_mm	Cysts_Excised	Myoma_Max_Diameter_mm	Myomas_Excised	Adverse_Event	Core_Difficulty_Score	Time_Interference_Score	Total_Score	Difficulty_Grade	Procedure_Baseline	FIGO_Increment	Size_Increment	Patient_Factor	Endometriosis_Score
1	Y29	4	20.202	0	0	Ectopic pregnancy			Single-port	Salpingectomy	Emergency	10	660	102	98	130	-4			1500						1	0.5	1.5	Low	1	0	0	0	0
2	Y30	7	18.3594	0	0	Ovarian teratoma			Single-port	Ovarian cystectomy	Elective	20	0	126	107	119	-19				92	1				4	0	4	Moderate	3	0	1	0	0
3	Y34	2	19.9219	1	0	Ectopic pregnancy			Multiport	Salpingectomy	Emergency	20	0	118	113	45	-5			20						2	0	2	Low	1	0	0	1	0
4	Y27	3	26.3702	0	0	Ectopic pregnancy			Single-port	Tuboplasty (salpingostomy/anastomosis/repair)	Emergency	20	0	134	118	135	-16									2	0	2	Low	2	0	0	0	0
5	Y28	4	28.2821	0	0	Ovarian teratoma			Single-port	Ovarian cystectomy	Emergency	100	0	110	97	173	-13				77	3				5	0.5	5.5	Moderate	3	0	1	1	0
6	Y30	4	20.83	0	0	Ectopic pregnancy			Single-port	Tuboplasty (salpingostomy/anastomosis/repair)	Emergency	20	0	100	97	135	-3			200						2	0	2	Low	2	0	0	0	0
7	Y86	12	20.8181	0	0	Sex cord-stromal tumor			Single-port	Adnexectomy	Elective	10	0	119	104	66	-15				56					2	0	2	Low	2	0	0	0	0
8	Y26	7	17.7282	0	0	Endometrioma			Single-port	Ovarian cystectomy	Emergency	300	0	109	102	155	-7				63	1				4	0	4	Moderate	3	0	1	0	0
9	Y35	4	25.5859	0	0	Hydrosalpinx		Simple	Single-port	Salpingectomy	Elective	100	0	120	104	145	-16									1	0.5	1.5	Low	1	0	0	0	0
10	Y45	3	20.6905	0	0	Uterine myoma			Single-port	Myomectomy	Elective	20	0	112	100	57	-12						57	1		3.5	0	3.5	Moderate	3	0.5	0	0	0
11	Y26	3	22.0317	0	0	Endometrioma			Single-port	Ovarian cystectomy	Elective	20	0	128	115	120	-13				75	1				4	0	4	Moderate	3	0	1	0	0
12	Y15	7	20.889	1	0	Ectopic pregnancy			Single-port	Tuboplasty (salpingostomy/anastomosis/repair)	Emergency	20	0	113	114	85	1									3	0	3	Moderate	2	0	0	1	0
13	Y29	5	15.4315	0	0	Endometrioma			Single-port	Ovarian cystectomy	Emergency	100	0	132	103	130	-29				68	1				4	0	4	Moderate	3	0	1	0	0
14	Y25	3	21.4536	0	0	Ovarian teratoma			Single-port	Ovarian cystectomy	Emergency	20	0	130	120	99	-10				119	1				5	0	5	Moderate	3	0	2	0	0
15	Y39	5	21.2279	1	0	Corpus luteum rupture			Single-port	Ovarian cystectomy	Emergency	20	0	133	116	107	-17			500						4	0.5	4.5	Moderate	3	0	0	1	0
16	Y33	10	22.0386	1	0	Endometrioma			Single-port	Ovarian cystectomy	Elective	100	0	130	111	104	-19				71	1				5	0	5	Moderate	3	0	1	1	0
17	Y46	5	21.7159	1	1	Ovarian teratoma			Single-port	Ovarian cystectomy	Elective	50	0	130	110	117	-20				55	1				5	0	5	Moderate	3	0	0	2	0
18	Y30	3	22.0317	0	0	Ectopic pregnancy			Single-port	Tuboplasty (salpingostomy/anastomosis/repair)	Emergency	50	0	118	113	195	-5									2	0	2	Low	2	0	0	0	0
19	Y38	4	21.9363	0	0	Ectopic pregnancy			Single-port	Salpingectomy	Emergency	10	0	133	109	65	-24			600						1	0.5	1.5	Low	1	0	0	0	0
20	Y31	6	24.4983	0	0	Ovarian teratoma			Single-port	Ovarian cystectomy	Elective	50	0	124	125	105	1				72	3				4	0.5	4.5	Moderate	3	0	1	0	0
21	Y35	2	25.3444	0	0	Ectopic pregnancy			Single-port	Salpingectomy	Emergency	5	0	141	123	45	-18									1	0	1	Low	1	0	0	0	0
22	Y46	9	30.6667	0	0	Adenomyosis			Single-port	Hysterectomy	Elective	50	0	103	94	150	-9	230	Ultrasound							6	0	6	High	5	0	0	1	0
23	Y34	4	32.3047	1	1	Ovarian teratoma		Simple	Single-port	Ovarian cystectomy	Elective	50	0	134	119	140	-15				44	1				6	0.5	6.5	High	3	0	0	3	0
24	Y47	5	23.4375	2	2	Corpus luteum cyst			Single-port	Ovarian cystectomy	Elective	50	0	135	122	84	-13				59	1				7	0	7	High	3	0	0	4	0
25	Y25	6	25.2994	1	0	Ectopic pregnancy			Single-port	Tuboplasty (salpingostomy/anastomosis/repair)	Emergency	20	0	134	127	67	-7									3	0	3	Moderate	2	0	0	1	0
26	Y43	8	27.7367	0	0	Uterine myoma			Single-port	Hysterectomy	Elective	150	0	132	122	211	-10	298	Ultrasound							5	0	5	Moderate	5	0	0	0	0
27	Y36	10	24.7475	2	2	Broad ligament myoma			Single-port	Broad ligament myomectomy	Elective	100	0	114	103	185	-11						64	1		10	0	10	Extreme	3	2	1	4	0
28	Y31	4	19.468	0	0	Ectopic pregnancy			Single-port	Tuboplasty (salpingostomy/anastomosis/repair)	Emergency	20	0	129	110	140	-19									2	0	2	Low	2	0	0	0	0
29	Y22	7	19.2277	0	0	Ovarian teratoma			Single-port	Ovarian cystectomy	Emergency	600	0	100	77	190	-23				110	2			Tumor recurrence at 10 months	5	0	5	Moderate	3	0	2	0	0
30	Y39	14	25.4779	1	1	Endometrial polyp		Simple	Single-port	Diagnostic laparoscopy	Elective	10	0	139	109	108	-30									2	0.5	2.5	Low	0	0	0	2	0
31	Y36	7	20.3074	0	0	Endometrioma			Single-port	Ovarian cystectomy	Elective	50		135	118	130	-17				19	1				3	0	3	Moderate	3	0	0	0	0
32	Y31	3	21.6441	0	0	Ectopic pregnancy			Single-port	Salpingectomy	Emergency	10	0	127	120	85	-7									1	0	1	Low	1	0	0	0	0
33	Y11	7	17.313	0	0	Ovarian teratoma			Single-port	Ovarian cystectomy	Elective	20	0	146	118	145	-28				130	1				5	0	5	Moderate	3	0	2	0	0
34	Y41	6	18.4911	0	0	Ovarian teratoma		Complex	Single-port	Ovarian cystectomy	Elective	20	0	99	80	111	-19				20	1				3	1	4	Moderate	3	0	0	0	0
35	Y31	5	27.0538	1	1	Ectopic pregnancy			Single-port	Salpingectomy	Emergency	5	0	127	121	64	-6			150						3	0	3	Moderate	1	0	0	2	0
36	Y30	4	20.0777	0	0	Endometrial hyperplasia		Simple	Single-port	Diagnostic laparoscopy	Elective	5	0	97		78										0	0.5	0.5	Low	0	0	0	0	0
37	Y49	5	21.875	0	0	Retained IUD		Simple	Single-port	Diagnostic laparoscopy	Elective	10	0	132		100										0	0.5	0.5	Low	0	0	0	0	0
38	Y31	7	23.4221	1	0	Other			Single-port	Salpingectomy	Elective	10	0	123	121	55	-2									2	0	2	Low	1	0	0	1	0
39	Y50	6	20.7031	1	0	Serous cystadenoma			Single-port	Adnexectomy	Elective	5	0	123	118	65	-5				57					3	0	3	Moderate	2	0	0	1	0
40	Y47	5	19.7711	0	0	Broad ligament myoma			Single-port	Broad ligament myomectomy	Elective	50	0	130	120	85	-10						50	2	Intestinal obstruction, small bowel resection	5	0	5	Moderate	3	2	0	0	0
41	Y32	4	22.3081	1	0	Uterine myoma		Complex	Single-port	Ovarian cystectomy	Elective	50	0	124	107	112	-17				52	1				4	1	5	Moderate	3	0	0	1	0
42	Y35	5	21.0938	1	1	Uterine myoma		Complex	Single-port	Myomectomy	Elective	50	0	84	61	175	-23						62	1		6.5	1	7.5	High	3	0.5	1	2	0
43	Y20	8	22.4	0	0	Ectopic pregnancy			Single-port	Ectopic removal	Emergency	20	0	133	123	111	-10			80						2	0	2	Low	2	0	0	0	0
44	Y29	3	18.8062	0	0	Ectopic pregnancy			Single-port	Salpingectomy	Emergency	20	0	130	115	67	-15			100						1	0	1	Low	1	0	0	0	0
45	Y35	2	23.634	2	2	Ovarian teratoma			Single-port	Ovarian cystectomy	Emergency	100	300	78	83	95	5				116	1				9	0	9	Extreme	3	0	2	4	0
46	Y28	2	26.6728	0	0	Ectopic pregnancy			Single-port	Salpingectomy	Emergency	20	0	134	113	65	-21			50						1	0	1	Low	1	0	0	0	0
47	Y42	13	21.1621	0	0	Uterine myoma			Single-port	Hysterectomy	Elective	250	0	129	102	320	-27	1075	Direct weighing							8	0	8	High	5	0	3	0	0
48	Y30	6	20.2291	0	0	Ectopic pregnancy			Single-port	Tuboplasty (salpingostomy/anastomosis/repair)	Emergency	20	400	111	102	220	-9									2	0	2	Low	2	0	0	0	0
49	Y22	4	19.563	0	0	Ectopic pregnancy			Single-port	Ectopic removal	Emergency	20	0	100	85	75	-15			100						2	0	2	Low	2	0	0	0	0
50	Y41	3	24.8828	1	1	Ectopic pregnancy			Single-port	Salpingectomy	Emergency	20	0	136	108	70	-28									3	0	3	Moderate	1	0	0	2	0
51	Y15	4	17.4251	0	0	Ovarian teratoma			Single-port	Ovarian cystectomy	Elective	20	0	110		75					48	1				3	0	3	Moderate	3	0	0	0	0
52	Y43	4	23.0332	2	2	Ovarian cyst		Complex	Single-port	Ovarian cystectomy	Elective	5		133		87					35	1				7	1	8	High	3	0	0	4	0
53	Y45	7	26.0454	2	2	Adenomyosis			Single-port	Hysterectomy	Elective	150	400	86	84	190	-2	433	MRI							10	0	10	Extreme	5	0	1	4	0
54	Y40	6	22.0719	0	0	Uterine myoma			Single-port	Myomectomy	Elective	100	0	131	107	165	-24						58	1		3.5	0	3.5	Moderate	3	0.5	0	0	0
55	Y26	5	19.9594	0	0	Ovarian cyst with torsion			Single-port	Ovarian cystectomy	Emergency	50		150	135	227	-15				61	4				4	0.5	4.5	Moderate	3	0	1	0	0
56	Y26	5	26.3236	0	0	Ovarian teratoma			Single-port	Ovarian cystectomy	Elective	20	0	144	137	90	-7				72	2				4	0	4	Moderate	3	0	1	0	0
57	Y21	5	21.1111	0	0	Ovarian teratoma			Single-port	Ovarian cystectomy	Elective	100	0	138	113	105	-25				91	1				4	0	4	Moderate	3	0	1	0	0
58	Y30	4	30.8642	1	0	Hydrosalpinx		Simple	Single-port	Tuboplasty (salpingostomy/anastomosis/repair)	Elective	10	0	127	121	87	-6									4	0.5	4.5	Moderate	2	0	0	2	0
59	Y24	2	18.6709	0	0	Ectopic pregnancy			Single-port	Ectopic removal	Emergency	20	0	107	97	68	-10			200						2	0	2	Low	2	0	0	0	0
60	Y31	4	21.9076	0	0	Ectopic pregnancy			Single-port	Tuboplasty (salpingostomy/anastomosis/repair)	Emergency	20	0	140	121	145	-19									2	0	2	Low	2	0	0	0	0
61	Y35	6	24.6094	1	0	Borderline serous tumor			Single-port	Ovarian cystectomy	Elective	30	0	119	123	128	4				96	1				5	0	5	Moderate	3	0	1	1	0
62	Y43	4	19.0982	0	0	Rudimentary horn		Complex	Single-port	Rudimentary horn resection	Elective	50	0	134		126										5	1	6	Moderate	5	0	0	0	0
63	Y45	4	23.4221	0	0	Uterine myoma		Simple	Single-port	Myomectomy	Elective	150	400	83	82	110	-1						52	1		4	0.5	4.5	Moderate	3	1	0	0	0
64	Y42	2	21.4844	1	1	Ectopic pregnancy			Single-port	Salpingectomy	Emergency	20	0	129	116	49	-13			50						3	0	3	Moderate	1	0	0	2	0
65	Y28	5	21.0938	0	0	Ectopic pregnancy			Single-port	Salpingectomy	Emergency	5	0	128	113	40	-15			50						1	0	1	Low	1	0	0	0	0
66	Y39	4	22.5896	1	1	Broad ligament myoma		Complex	Single-port	Broad ligament myomectomy	Elective	80	0	136	118	164	-18						61	1		8	1	9	High	3	2	1	2	0
67	Y42	4	23.3275	1	1	Endometrioma	1	Complex	Single-port	Ovarian cystectomy	Elective	100	0	118	93	210	-25				63	2				7	1	8	High	3	0	1	2	1
68	Y44	1	28.125	0	0	Ovarian cyst with torsion			Single-port	Adnexectomy	Emergency	20	0	118	109	63	-9				106					3	0	3	Moderate	2	0	0	1	0
69	Y29	6	23.634	0	0	Ectopic pregnancy			Single-port	Ectopic removal	Emergency	10	0	112	103	150	-9								Persistent ectopic pregnancy, reoperation	2	0	2	Low	2	0	0	0	0
70	Y45	6	28.3987	0	0	Ovarian cyst			Single-port	Adnexectomy	Elective	400	0	138	104	241	-34				67					3	0	3	Moderate	2	0	0	1	0
71	Y51	10	26.7229	0	0	Ovarian cyst			Single-port-plus-one	Hysterectomy	Elective	100	0	91	94	238	3	376	Ultrasound							6	0	6	High	5	0	1	0	0
72	Y41	4	30.7242	3	2	Ectopic pregnancy	1		Single-port	Hysterectomy	Elective	200	0	151	149	215	-2	525	Direct weighing							13	0	13	Extreme	5	0	2	5	1
73	Y42	5	25.8889	0	0	Endometrioma	1		Single-port	Hysterectomy	Elective	50	0	118	110	143	-8	280	MRI							6	0	6	High	5	0	0	0	1
74	Y70	7	20.7031	0	0	Endometrial polyp			Single-port	Hysterectomy	Elective	20	0	118	107	150	-11	25	Ultrasound							5	0	5	Moderate	5	0	0	0	0
75	Y33	1	24.3418	0	0	Ectopic pregnancy			Single-port	Salpingectomy	Emergency	5	0	99	86	60	-13			400						1	0	1	Low	1	0	0	0	0
76	Y59	4	22.213	1	0	Serous cystadenoma			Single-port	Hysterectomy	Emergency	50	0	124	101	124	-23	12	Ultrasound		104					6	0	6	High	5	0	0	1	0
77	Y35	1	19.6283	0	0	Endometrioma			Single-port	Ovarian cystectomy	Elective	10		133		90					63	1				4	0	4	Moderate	3	0	1	0	0
78	Y41	1	30.3302	2	2	Adenomyosis		Complex	Single-port	Adnexectomy	Elective	800	700	107	105	237	-2				81					7	1	8	High	2	0	0	5	0
79	Y31	1	17.3604	0	0	Ovarian cyst with torsion			Single-port	Ovarian cystectomy	Emergency	20	0	137		105					76	1				4	0	4	Moderate	3	0	1	0	0
80	Y31	5	23.1247	1	0	Ectopic pregnancy			Single-port	Salpingectomy	Emergency	20	0	130	118	64	-12									2	0	2	Low	1	0	0	1	0
81	Y35	2	20.2848	0	0	Ectopic pregnancy			Single-port	Salpingectomy	Emergency	5	400	114	88	71	-26			1000						1	0.5	1.5	Low	1	0	0	0	0
82	Y40	2	21.83	0	0	Endometrioma	1		Single-port	Ovarian cystectomy	Elective	600	400	109	98	185	-11				100	1				6	0	6	High	3	0	2	0	1
83	Y39	4	42.517	0	0	Ovarian cyst with torsion			Single-port	Adnexectomy	Emergency	50	0	141	139	135	-2				121					4	0	4	Moderate	2	0	0	2	0
84	Y46	8	21.5045	1	0	Ovarian cyst			Single-port	Hysterectomy	Elective	50	400	74	78	168	4	470	Direct weighing						Acute gastroenteritis	7	0	7	High	5	0	1	1	0
85	Y34	2	24.5095	0	0	Uterine myoma			Single-port	Myomectomy	Elective	500		133	100	282	-33						82	4		5.5	0.5	6	Moderate	3	0.5	2	0	0
86	Y45	6	27.0993	1	1	Adenomyosis	1		Single-port	Hysterectomy	Elective	100	400	74	87	265	13	710	Direct weighing							10	0	10	Extreme	5	0	2	2	1
87	Y24	1	19.6641	0	0	Ectopic pregnancy			Single-port	Salpingectomy	Emergency	5	400	110	101	92	-9			900						1	0.5	1.5	Low	1	0	0	0	0
88	Y30	2	20.5078	0	0	Adenomyosis			Single-port	Myomectomy	Elective	150	0	141	130	166	-11						48	2		3.5	0	3.5	Moderate	3	0.5	0	0	0
89	Y26	2	19.9219	0	0	Ectopic pregnancy			Single-port	Ectopic removal	Emergency	50	0	117	100	156	-17									2	0	2	Low	2	0	0	0	0
90	Y35	2	26.7094	2	2	Ovarian teratoma			Single-port	Ovarian cystectomy	Elective	20	0	137	137	78	0				47	1				7	0	7	High	3	0	0	4	0
91	Y22	2	18.5826	0	0	Corpus luteum rupture			Single-port	Ovarian cystectomy	Emergency	50	680	89	119	85	30									3	0	3	Moderate	3	0	0	0	0
92	Y51	6	28.8415	1	1	Uterine myoma			Single-port	Hysterectomy	Elective	200	0	127	112	162	-15	371	Ultrasound							9	0	9	Extreme	5	0	1	3	0
93	Y33	4	20.7031	0	0	Uterine myoma			Single-port	Myomectomy	Emergency	250	0	116	99	110	-17						136	1		5	0	5	Moderate	3	0	2	0	0
94	Y24	4	19.6283	0	0	Ectopic pregnancy			Single-port	Tuboplasty (salpingostomy/anastomosis/repair)	Emergency	100	0	137	133	98	-4									2	0	2	Low	2	0	0	0	0
95	Y46	3	24.8358	2	0	Uterine myoma			Single-port	Hysterectomy	Elective	300	0	101	94	245	-7	280	MRI							7	0	7	High	5	0	0	2	0
96	Y30	1	21.3382	0	0	Ectopic pregnancy			Single-port	Tuboplasty (salpingostomy/anastomosis/repair)	Elective	5	0	145	131	64	-14									2	0	2	Low	2	0	0	0	0
97	Y55	9	22.6003	1	0	Cervical myoma			Single-port	Hysterectomy	Elective	50	0	132	128	100	-4	24	Ultrasound							6	0	6	High	5	0	0	1	0
98	Y39	3	16.9747	0	0	Ovarian cyst		Complex	Single-port	Myomectomy	Elective	150	0	75	79	160	4						60	1		5	1	6	Moderate	3	1	1	0	0
99	Y35	2	22.4059	0	0	Broad ligament myoma			Single-port	Broad ligament myomectomy	Elective	100		139	112	134	-27						71	1		6	0	6	High	3	2	1	0	0
100	Y50	2	36.9353	1	0	Ovarian teratoma			Single-port-plus-one	Adnexectomy	Elective	50		132	121	100	-11									5	0	5	Moderate	2	0	0	3	0
101	Y33	5	16.6016	0	0	Ectopic pregnancy			Single-port	Salpingectomy	Emergency	5	0	129	104	65	-25			100						1	0	1	Low	1	0	0	0	0
102	Y37	3	20.2913	3	2	Ectopic pregnancy			Single-port	Salpingectomy	Emergency	10	0	102	86	64	-16			300						5	0	5	Moderate	1	0	0	4	0
103	Y38	2	24.1672	0	0	Uterine myoma		Complex	Single-port	Myomectomy	Elective	100		139	125	220	-14						100	1		7	1	8	High	3	2	2	0	0
104	Y27	2	25.9215	0	0	Ovarian cyst			Single-port	Tuboplasty (salpingostomy/anastomosis/repair)	Elective	10		107		128										2	0	2	Low	2	0	0	0	0
105	Y33	3	23.8751	0	0	Ovarian cyst		Simple	Single-port	Ovarian cystectomy	Elective	10		131	131	55	0				30	1				3	0.5	3.5	Moderate	3	0	0	0	0
106	Y26	4	23.3355	1	1	Ectopic pregnancy			Single-port	Salpingectomy	Emergency	20	233	106	88	90	-18									3	0	3	Moderate	1	0	0	2	0
107	Y25	2	28.2828	0	0	Ovarian teratoma		Simple	Single-port	Ovarian cystectomy	Elective	150		135		255						20				4	1	5	Moderate	3	0	0	1	0
108	Y38	4	17.5052	1	0	Serous cystadenoma	1		Single-port	Ovarian cystectomy	Elective	100		104	92	134	-12				121	1				7	0	7	High	3	0	2	1	1
109	Y46	8	23.3377	0	0	Adenomyosis	1		Single-port	Hysterectomy	Elective	200	0	99	91	170	-8	141	Ultrasound							6	0	6	High	5	0	0	0	1
110	Y24	3	18.0802	0	0	Ovarian teratoma			Single-port	Ovarian cystectomy	Elective	50	0	139	129	78	-10				45	1				3	0	3	Moderate	3	0	0	0	0
111	Y39	2	23.9334	0	0	Uterine myoma			Single-port	Myomectomy	Elective	300		139	126	213	-13						90	1		7	0	7	High	3	2	2	0	0
112	Y36	3	20.0288	0	0	Ectopic pregnancy			Single-port	Ectopic removal	Emergency	20	0	115	103	90	-12									2	0	2	Low	2	0	0	0	0
113	Y64	8	23.0518	0	0	Ovarian fibroma			Single-port	Hysterectomy	Emergency	100	0	125	118	146	-7	21	Ultrasound		43					5	0	5	Moderate	5	0	0	0	0
114	Y38	3	20.2848	2	2	Ectopic pregnancy			Single-port	Ectopic removal	Emergency	20	0	112	94	90	-18									6	0	6	High	2	0	0	4	0
115	Y33	3	22.1828	0	0	Sex cord-stromal tumor			Single-port	Adnexectomy	Elective	10	0	143	130	85	-13				83					2	0	2	Low	2	0	0	0	0
116	Y50	9	24.4444	1	1	Endometrioma	1		Single-port	Hysterectomy	Elective	150	0	140	99	315	-41	566	Direct weighing							10	0	10	Extreme	5	0	2	2	1
117	Y23	4	15.2416	0	0	Ovarian teratoma			Single-port	Ovarian cystectomy	Elective	200	0	135	106	130	-29				72	1				4	0	4	Moderate	3	0	1	0	0
118	Y34	19	18.4592	1	0	Ovarian cyst			Single-port	Salpingectomy	Elective	50	0	126	117	95	-9									2	0	2	Low	1	0	0	1	0
119	Y42	11	19.8413	0	0	Adenomyosis			Single-port	Hysterectomy	Elective	50	0	83	80	134	-3	209	Ultrasound							5	0	5	Moderate	5	0	0	0	0
120	Y38	3	21.8183	0	0	Uterine myoma			Single-port	Myomectomy	Elective	50		133	129	125	-4						61	2		4.5	0	4.5	Moderate	3	0.5	1	0	0
121	Y36	4	22.4996	0	0	Uterine myoma			Single-port	Myomectomy	Elective	100	0	115	113	170	-2						56	2		5	0	5	Moderate	3	2	0	0	0
122	Y30	4	22.2685	0	0	Ectopic pregnancy			Single-port	Tuboplasty (salpingostomy/anastomosis/repair)	Emergency	20		132	122	100	-10									2	0	2	Low	2	0	0	0	0
123	Y31	2	28.6161	1	0	Hydrosalpinx	1		Single-port	Salpingectomy	Elective	5		129	114	132	-15									4	0	4	Moderate	1	0	0	2	1
124	Y27	3	18.2563	0	0	Serous cystadenoma			Single-port	Ovarian cystectomy	Elective	100		102	90	162	-12				55	4				3	0.5	3.5	Moderate	3	0	0	0	0
125	Y30	2	23.0529	0	0	Ovarian teratoma			Single-port	Ovarian cystectomy	Emergency	50	0	128	122	105	-6				98	1				4	0	4	Moderate	3	0	1	0	0
126	Y36	3	19.2336	0	0	Ectopic pregnancy			Single-port	Salpingectomy	Emergency	20		120	112	41	-8									1	0	1	Low	1	0	0	0	0
127	Y33	3	22.1893	0	0	Ectopic pregnancy			Single-port	Salpingectomy	Emergency	5	300	132	97	66	-35			1800						1	0.5	1.5	Low	1	0	0	0	0
128	Y36	3	26.0375	0	0	Ovarian fibroma			Single-port	Ovarian cystectomy	Emergency	20	0	122	110	102	-12				94	1				4	0	4	Moderate	3	0	1	0	0
129	Y51	8	27.3438	1	0	Corpus luteum cyst			Single-port	Hysterectomy	Elective	800	400	79	81	279	2	1020	Direct weighing							9	0	9	Extreme	5	0	3	1	0
130	Y48	6	25	1	0	Ectopic pregnancy	1		Single-port	Hysterectomy	Elective	500	0	97	108	300	11	985	Direct weighing						Impaired wound healing	10	0	10	Extreme	5	0	3	1	1

## Sheet: Special cases
Case_ID	Incision_Type	Procedure_Type	Intraop_Blood_Loss_mL	Operative_Time_min	Core_Difficulty_Score	Difficulty_Grade	Special Characteristics
47	Single-port	Hysterectomy	250	320	8	High	A 1075 g mass of multiple giant fibroids, fundus at one fingerbreadth above the umbilicus. MRI showed two huge fibroids: the largest (105×64×100 mm) at the fundus, and another (98×74×72 mm) at the lower posterior wall, obliterating the posterior pelvis
50	Single-port	Salpingectomy	20	70	3	Moderate	To prevent bleeding during interstitial pregnancy surgery, a barbed suture was placed as a purse‑string ligature around the cornua. Following salpingectomy, the cornua was incised to remove the pregnancy, and the incision was then reapproximated with barbed suture. Blood loss was negligible. The patient became pregnant six months after surgery and delivered at term.
82	Single-port	Ovarian cystectomy	600	185	6	High	A 10 cm ovarian endometrioma with extensive dense adhesions involving more than half of the cyst surface to the omentum and bowel, which had previously been aspirated twice.
83	Single-port	Adnexectomy	50	135	4	Moderate	BMI 42.5, adnexal torsion (CT measurements: 121 × 95 × 67 mm). Emergency surgery was performed; high airway pressure precluded a steeper Trendelenburg position. CO₂ insufflation pressure was set at 10 mmHg with a flow of 20 L/min, and gauze was used to facilitate exposure.
86	Single-port	Hysterectomy	100	265	10	Extreme	The uterus weighed 710 g. The patient had a prior history of open myomectomy for adenomyoma and tubal ligation. Dense, extensive adhesions were present between the uterus, bowel, and omentum, which thickly covered the fundus and posterior uterine wall, making the rectouterine pouch completely obscured.
102	Single-port	Salpingectomy	10	64	5	Moderate	About 300 mL of hemoperitoneum and clots were present. Severe adhesions from a previous cesarean section caused the entire anterior uterine wall to be densely adhered to the abdominal wall. The right fallopian tube was distorted and adherent, precluding normal identification, which greatly challenged anatomical recognition and assessment of operative angles.
103	Single-port	Myomectomy	100	220	7	High	A 10 cm posterior myoma (actual weight 500 g) led to uterine deformation. The uterine longitudinal axis was forced perpendicular to the body axis, making cervical exposure impossible on pelvic exam. Laparoscopic myomectomy was performed first, followed by hysteroscopy to expose the cervix, after which the endometrial polyp was successfully resected.
111	Single-port	Myomectomy	300	213	7	High	A challenging myomectomy was performed for a 9 cm anterior cervical myoma, which weighed 400 g on actual measurement. The myoma was a single, lobulated, fused mass located on the anterior cervix, causing passive elongation of the cervix and lower uterine segment to about 10 cm.
116	Single-port	Hysterectomy	150	315	10	Extreme	Huge uterine fibroid with a 6 cm ovarian chocolate cyst. Fundus at the umbilicus, rectouterine pouch obliterated. Postoperative uterine weight 566 g.
129	Single-port	Hysterectomy	800	279	9	Extreme	Multiple uterine fibroids. MRI: uterine dimensions 200 mm (length) × 100 mm (thickness) × 120 mm (width); fundus one fingerbreadth above umbilicus. Intraoperative bleeding from the right tubo‑ovarian mesenteric vein; hemostasis time 8 minutes. Postoperative uterine weight 1020 g.
130	Single-port	Hysterectomy	500	300	10	Extreme	Multiple uterine fibroids (CT: 148 × 84 × 133 mm), uterine weight 985 g. Prior multiport laparoscopy for ectopic pregnancy left severe scar hypertrophy at a transverse umbilical incision. The same incision was reused (unlike the author’s standard vertical midline umbilical incision for all other single‑port cases). Flap repair was lengthy; umbilical closure took 60 minutes. Postoperative healing …
